# Supplementary material for: The chordate ancestor possessed a single copy of the Brachyury gene for notochord acquisition
Source: PubMed Central journal article supplement (PMC5363035; doi:10.1186/s40851-017-0064-9), 2017-03-23

a. DNA dataset.

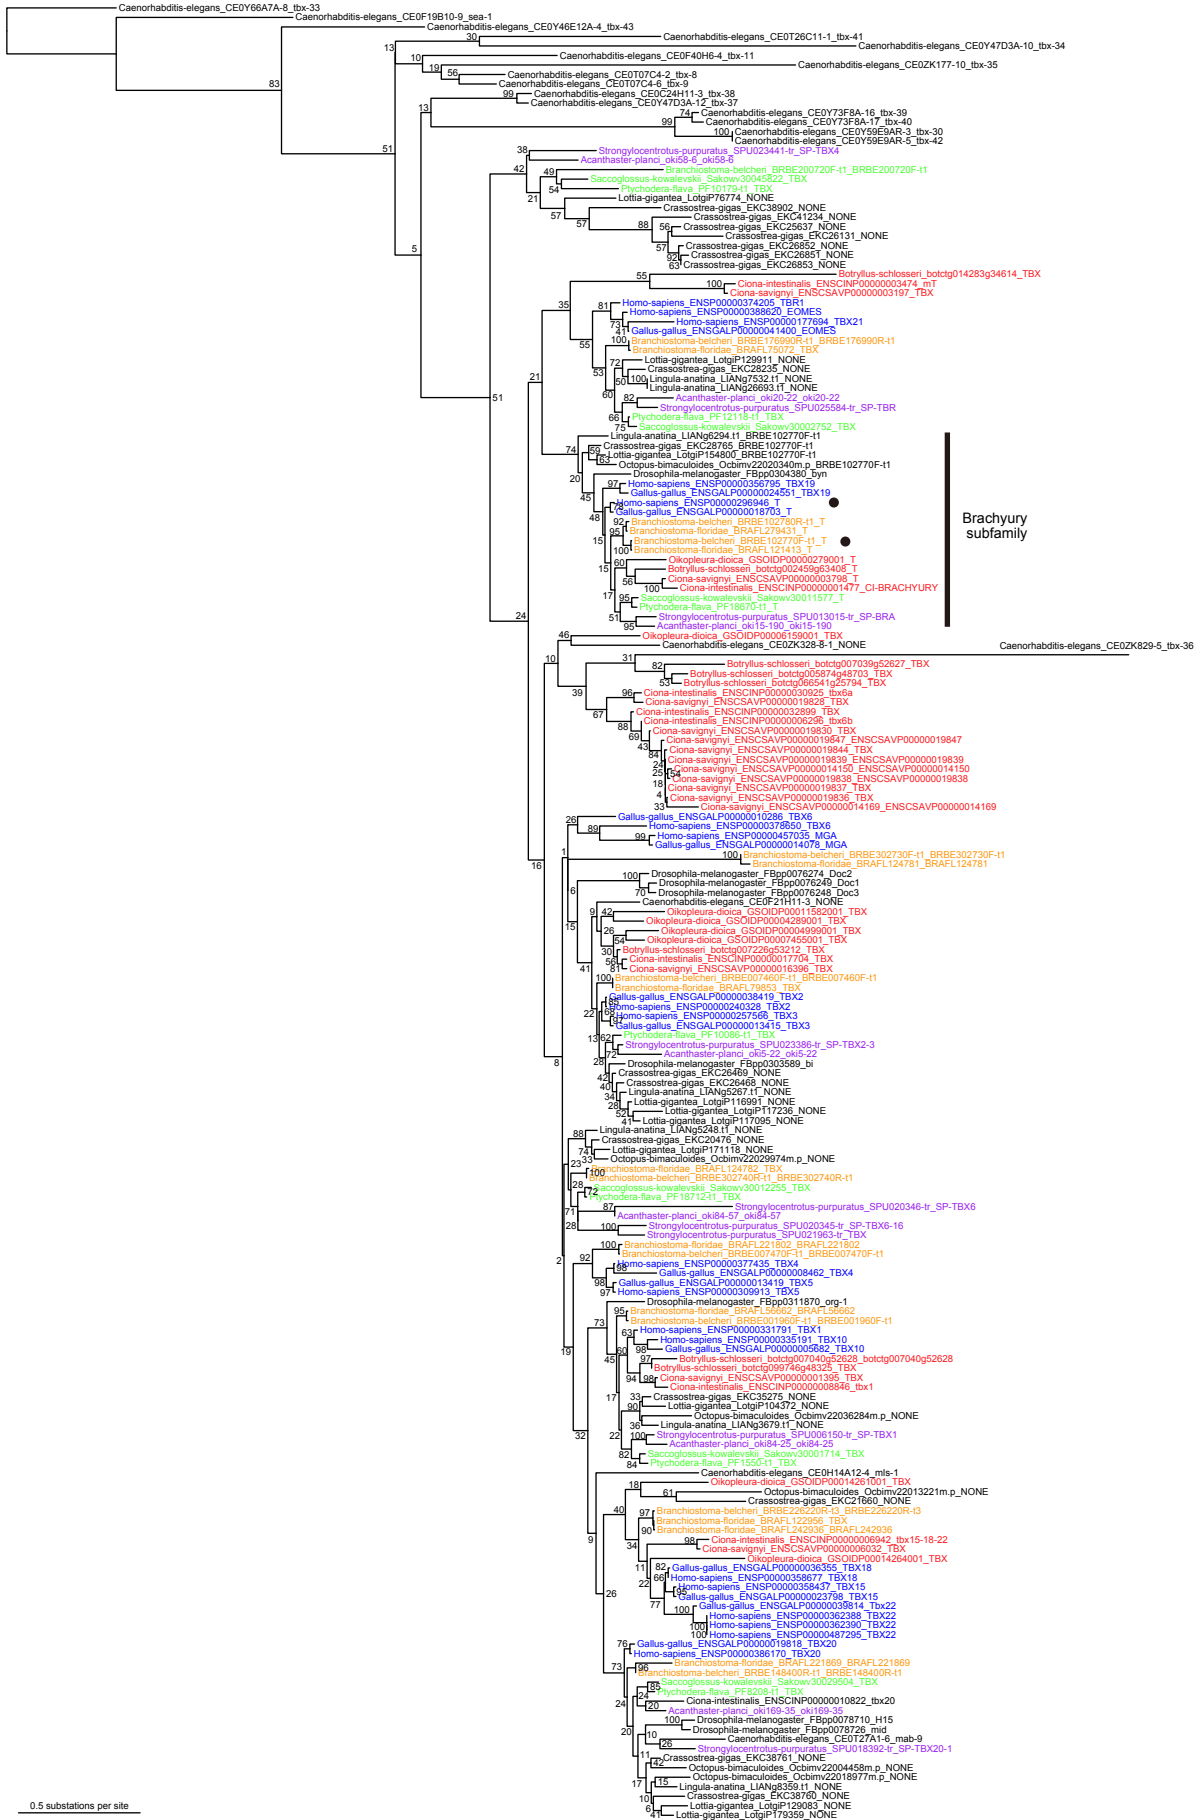

b. Amino acid dataset.

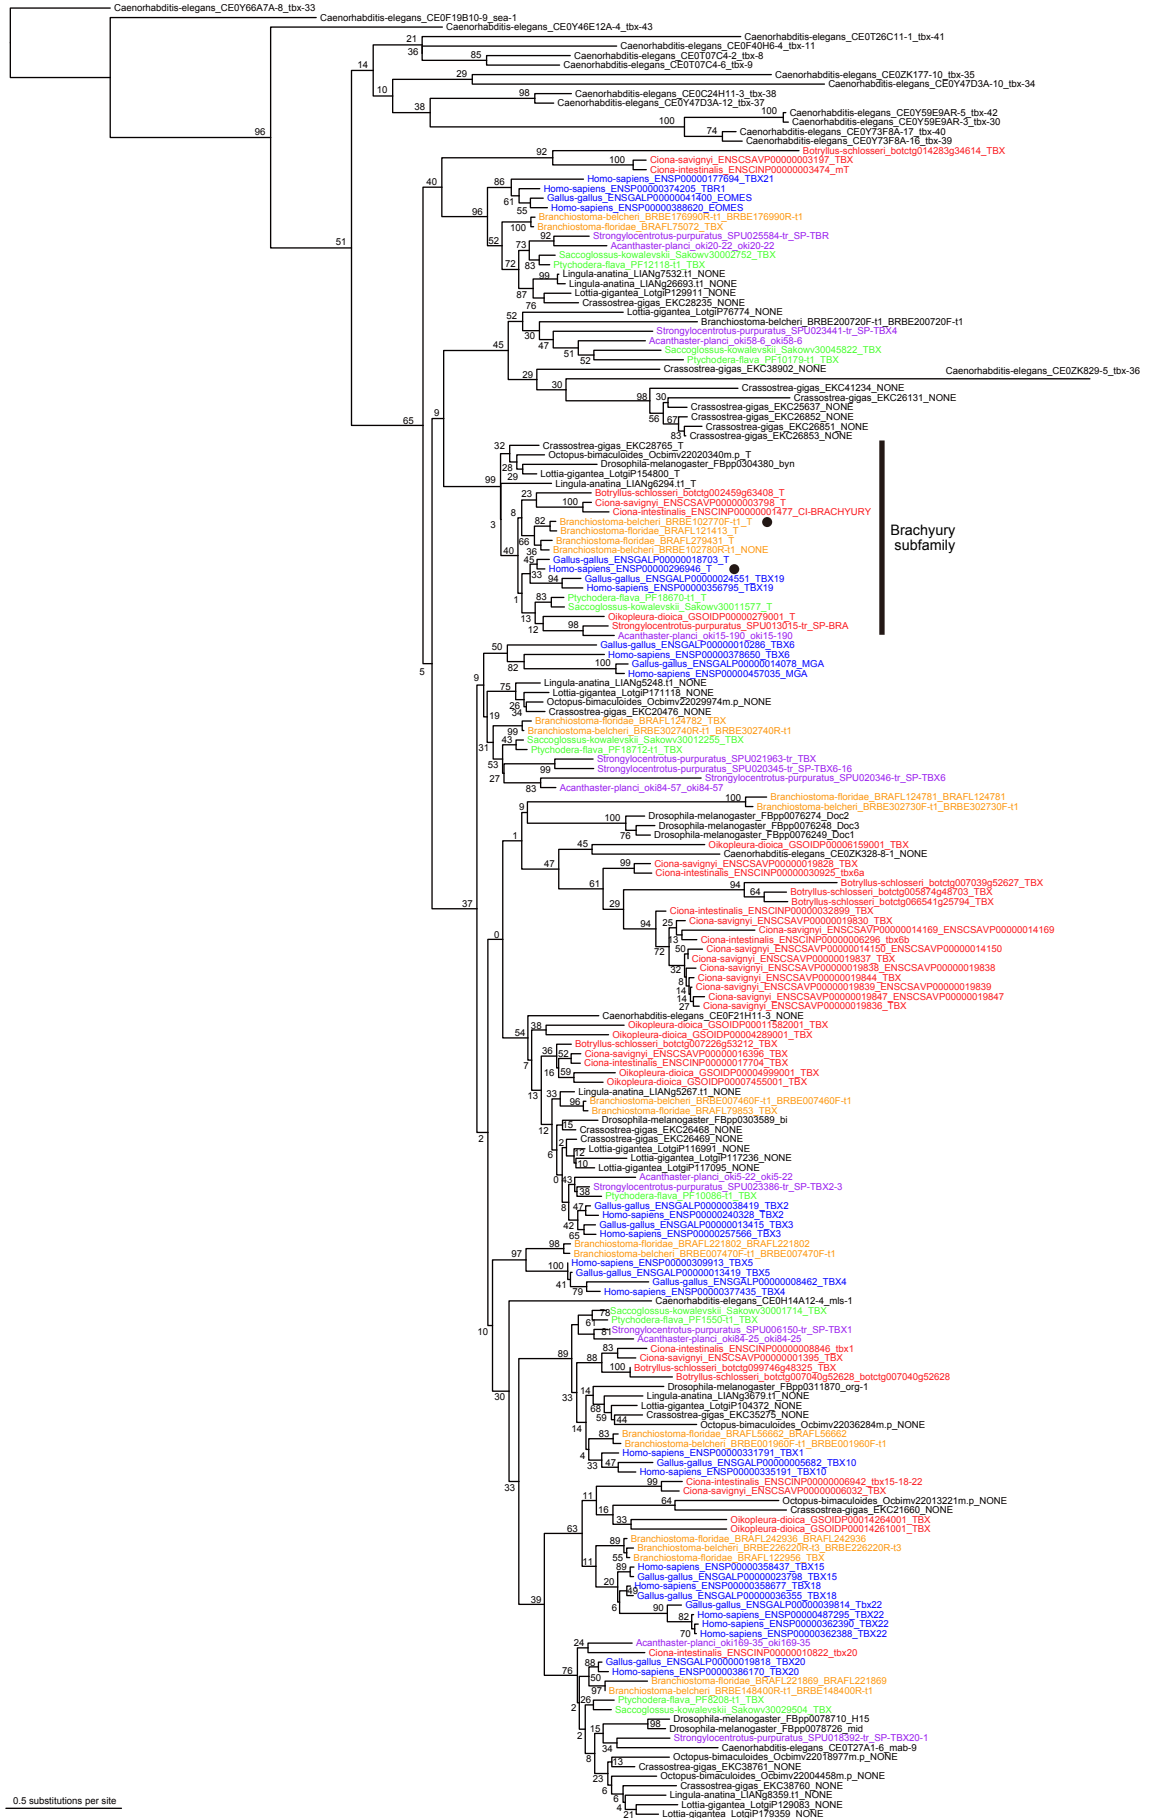

Supplement: 40851_2017_64_MOESM2_ESM.pdf [file 40851_2017_64_MOESM2_ESM.pdf]
