# Supplementary material for: The chordate ancestor possessed a single copy of the Brachyury gene for notochord acquisition
Source: PubMed Central journal article supplement (PMC5363035; doi:10.1186/s40851-017-0064-9), 2017-03-23
Supplement: 40851_2017_64_MOESM3_ESM.pdf [file 40851_2017_64_MOESM3_ESM.pdf]

1081  
Drosophila-melanogaster Fbpp0304380  
Lottia-gigantea LotgP154800  
Octopus ochimv22020340m.p  
Crassostrea-gigas EKC28765  
Lingula-anatina LIANG6294.t1  
Botryllus-schlosseri botctg002459g63408  
Oikopleura-dioica GSOIDP00000279001  
Ciona-savignyi ENSICAVP000003799  
Ciona-intestinalis ENSINCP0000001477  
Ptychodera-flava PF18670-t1  
Saccoglossus-kowalevskii Sakow30011577  
Acanthaster-planci ok15-190  
Strongylocentrotus-purpuratusS SP0013015-tr  
Branchiostoma-belcheri BRBE102780R-t1  
Branchiostoma-floridae BRAFL1279431  
Branchiostoma-floridae BRAFL121413  
Branchiostoma-belcheri BRBE102770F-t1  
Gallus-gallus ENSGALP0000024551 TBX19  
Homo-sapiens ENSNP00000356795 TBX19  
Gallus-gallus ENSGALP0000018703  
Homo-sapiens ENSNP0000296946

1261  
Drosophila-melanogaster Fbpp0304380  
Lottia-gigantea LotgP154800  
Octopus ochimv22020340m.p  
Crassostrea-gigas EKC28765  
Lingula-anatina LIANG6294.t1  
Botryllus-schlosseri botctg002459g63408  
Oikopleura-dioica GSOIDP00000279001  
Ciona-savignyi ENSICAVP000003799  
Ciona-intestinalis ENSINCP0000001477  
Ptychodera-flava PF18670-t1  
Saccoglossus-kowalevskii Sakow30011577  
Acanthaster-planci ok15-190  
Strongylocentrotus-purpuratusS SP0013015-tr  
Branchiostoma-belcheri BRBE102780R-t1  
Branchiostoma-floridae BRAFL1279431  
Branchiostoma-floridae BRAFL121413  
Branchiostoma-belcheri BRBE102770F-t1  
Gallus-gallus ENSGALP0000024551 TBX19  
Homo-sapiens ENSNP00000356795 TBX19  
Gallus-gallus ENSGALP0000018703  
Homo-sapiens ENSNP0000296946

1441  
Drosophila-melanogaster Fbpp0304380  
Lottia-gigantea LotgP154800  
Octopus ochimv22020340m.p  
Crassostrea-gigas EKC28765  
Lingula-anatina LIANG6294.t1  
Botryllus-schlosseri botctg002459g63408  
Oikopleura-dioica GSOIDP00000279001  
Ciona-savignyi ENSICAVP000003799  
Ciona-intestinalis ENSINCP0000001477  
Ptychodera-flava PF18670-t1  
Saccoglossus-kowalevskii Sakow30011577  
Acanthaster-planci ok15-190  
Strongylocentrotus-purpuratusS SP0013015-tr  
Branchiostoma-belcheri BRBE102780R-t1  
Branchiostoma-floridae BRAFL1279431  
Branchiostoma-floridae BRAFL121413  
Branchiostoma-belcheri BRBE102770F-t1  
Gallus-gallus ENSGALP0000024551 TBX19  
Homo-sapiens ENSNP00000356795 TBX19  
Gallus-gallus ENSGALP0000018703  
Homo-sapiens ENSNP0000296946

1621  
Drosophila-melanogaster Fbpp0304380  
Lottia-gigantea LotgP154800  
Octopus ochimv22020340m.p  
Crassostrea-gigas EKC28765  
Lingula-anatina LIANG6294.t1  
Botryllus-schlosseri botctg002459g63408  
Oikopleura-dioica GSOIDP00000279001  
Ciona-savignyi ENSICAVP000003799  
Ciona-intestinalis ENSINCP0000001477  
Ptychodera-flava PF18670-t1  
Saccoglossus-kowalevskii Sakow30011577  
Acanthaster-planci ok15-190  
Strongylocentrotus-purpuratusS SP0013015-tr  
Branchiostoma-belcheri BRBE102780R-t1  
Branchiostoma-floridae BRAFL1279431  
Branchiostoma-floridae BRAFL121413  
Branchiostoma-belcheri BRBE102770F-t1  
Gallus-gallus ENSGALP0000024551 TBX19  
Homo-sapiens ENSNP00000356795 TBX19  
Gallus-gallus ENSGALP0000018703  
Homo-sapiens ENSNP0000296946

1801  
Drosophila-melanogaster Fbpp0304380  
Lottia-gigantea LotgP154800  
Octopus ochimv22020340m.p  
Crassostrea-gigas EKC28765  
Lingula-anatina LIANG6294.t1  
Botryllus-schlosseri botctg002459g63408  
Oikopleura-dioica GSOIDP00000279001  
Ciona-savignyi ENSICAVP000003799  
Ciona-intestinalis ENSINCP0000001477  
Ptychodera-flava PF18670-t1  
Saccoglossus-kowalevskii Sakow30011577  
Acanthaster-planci ok15-190  
Strongylocentrotus-purpuratusS SP0013015-tr  
Branchiostoma-belcheri BRBE102780R-t1  
Branchiostoma-floridae BRAFL1279431  
Branchiostoma-floridae BRAFL121413  
Branchiostoma-belcheri BRBE102770F-t1  
Gallus-gallus ENSGALP0000024551 TBX19  
Homo-sapiens ENSNP00000356795 TBX19  
Gallus-gallus ENSGALP0000018703  
Homo-sapiens ENSNP0000296946

1981  
Drosophila-melanogaster Fbpp0304380  
Lottia-gigantea LotgP154800  
Octopus ochimv22020340m.p  
Crassostrea-gigas EKC28765  
Lingula-anatina LIANG6294.t1  
Botryllus-schlosseri botctg002459g63408  
Oikopleura-dioica GSOIDP00000279001  
Ciona-savignyi ENSICAVP000003799  
Ciona-intestinalis ENSINCP0000001477  
Ptychodera-flava PF18670-t1  
Saccoglossus-kowalevskii Sakow30011577  
Acanthaster-planci ok15-190  
Strongylocentrotus-purpuratusS SP0013015-tr  
Branchiostoma-belcheri BRBE102780R-t1  
Branchiostoma-floridae BRAFL1279431  
Branchiostoma-floridae BRAFL121413  
Branchiostoma-belcheri BRBE102770F-t1  
Gallus-gallus ENSGALP0000024551 TBX19  
Homo-sapiens ENSNP00000356795 TBX19  
Gallus-gallus ENSGALP0000018703  
Homo-sapiens ENSNP0000296946
